# Supplementary material for: Psoriasis Causes Significant Economic Burden to Patients
Source: Springer Nature journal article supplement (doi:10.1007/s13555-014-0053-2), 2014-05-27
Supplement: MOESM1 [file 9271036]

- This study was based on all psoriasis and psoriasis arthritis patients who visited a tertiary level dermatological clinic during a one-year study period.
- Data was based on a questionnaire, reimbursement data from The Finnish Social Insurance Institute and the medical records of the patients.
- The results showed that psoriasis has a significant negative effect on a patient's economics.
- Travel costs, travel and treatment time comprise the majority of costs of phototherapy.
- The many aspects of economic burden to psoriasis patients should be taken into account in future cost studies.

This summary slide represents the opinions of the authors. This study was supported by grants from the Hospital District of Southwest Finland. For a full list of acknowledgments and conflicts of interest for all authors of this article, please see the full text online. Copyright © The Authors 2014. Creative Commons Attribution Noncommercial License (CC BY-NC).
